# Supplementary material for: Antimicrobial Effect of Carbon Nanodots–ZnO Nanocomposite Synthesized Using Sargassum horneri
Source: MDPI journal article supplement (doi:10.3390/jmse10101546), 2022-10-20
Supplement: s1 [file s1]

## Supplementary Materials

# Antimicrobial Effect of Carbon Nanodots–ZnO Nanocomposite Synthesized Using *Sargassum horneri*

Kyung Woo Kim <sup>1,\*</sup>, Dawoon Chung <sup>2</sup>, Seung-Hyun Jung <sup>3</sup>, Yong Min Kwon <sup>2</sup>, Jawoon Young Hwan Kim <sup>2</sup> and Kyunghwa Baek <sup>1,\*</sup>

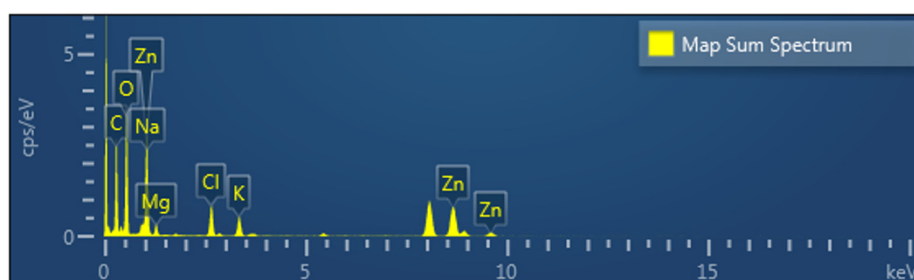

| Element | Wt%    | Atomic % |
|---------|--------|----------|
| C       | 42.77  | 60.11    |
| O       | 26.24  | 27.69    |
| Na      | 2.71   | 1.99     |
| Mg      | 1.80   | 1.25     |
| Cl      | 6.33   | 3.01     |
| K       | 4.28   | 1.85     |
| Zn      | 15.87  | 4.10     |
| Total:  | 100.00 | 100.00   |

**Figure S1.** EDS spectra of the synthesized CNDs–ZnO and its atomic percentage

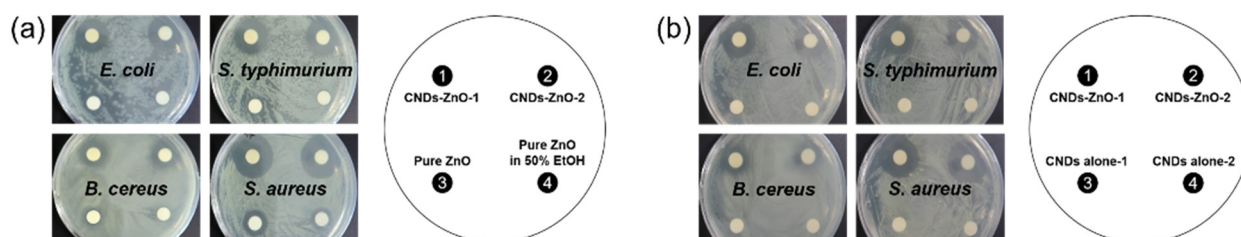

**Figure S2.** Plate images of disk diffusion antibacterial test for (a) CNDs–ZnO and Pure ZnO; (b) CNDs–ZnO and CNDs alone

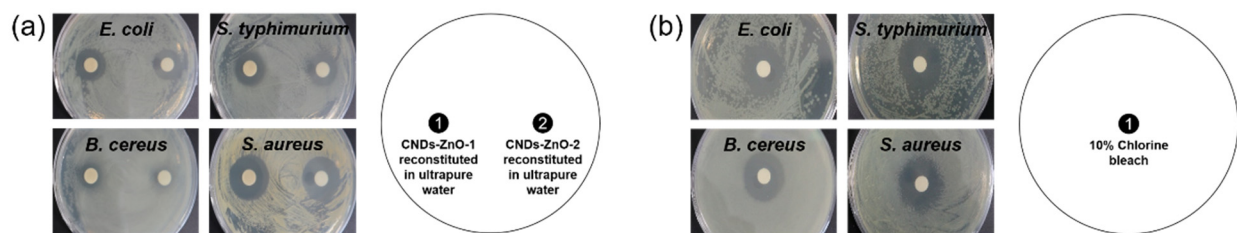

**Figure S3.** Plate images of disk diffusion antibacterial test for (a) lyophilized CNDs-ZnO after re-dissolved in ultrapure water; (b) 10% Chlorine bleach solution

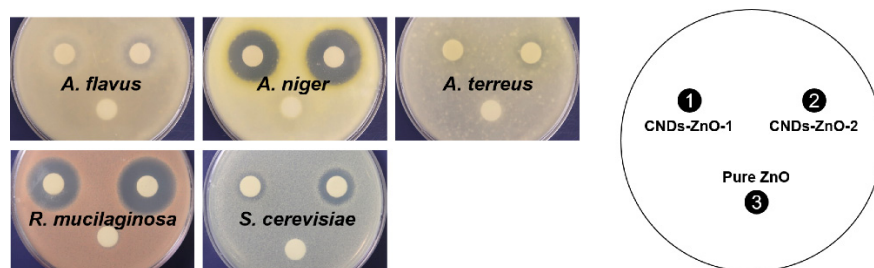

**Figure S4.** Plate images of disk diffusion antifungal test for CNDs-ZnO and Pure ZnO
